# Supplementary material for: Observation of metal ion dependent packing structures and magnetic behaviors of metal-bis-1, 2-dithiolene complexes
Source: Royal Society of Chemistry journal article supplement (doi:10.1039/c1dt11477h), 2012-01-01
Supplement: c1dt11477h.pdf [file c1dt11477h.pdf]

## **Observation of metal ion dependent packing structures and magnetic behaviors of metal-bis-1, 2-dithiolene complexes**

Wen-Bo Pei <sup>a</sup> Jian-Sheng Wu <sup>a</sup> Xiao-Ming Ren <sup>\*a,b</sup> Zheng-Fang Tian <sup>a</sup> Jingli Xie <sup>\*c</sup>

<sup>a</sup> State Key Laboratory of Materials-Oriented Chemical Engineering and College of Science, Nanjing University of Technology, Nanjing 210009, P. R. China

<sup>b</sup> State Key Lab & Coordination Chemistry Institute, Nanjing University, Nanjing 210093, P. R. China

<sup>c</sup> School of Chemistry, Monash University, Clayton, Victoria 3800, Australia

Tel.: +86 25 83587820

Fax: +86 25 83587420

Email: xmren@njut.edu.cn

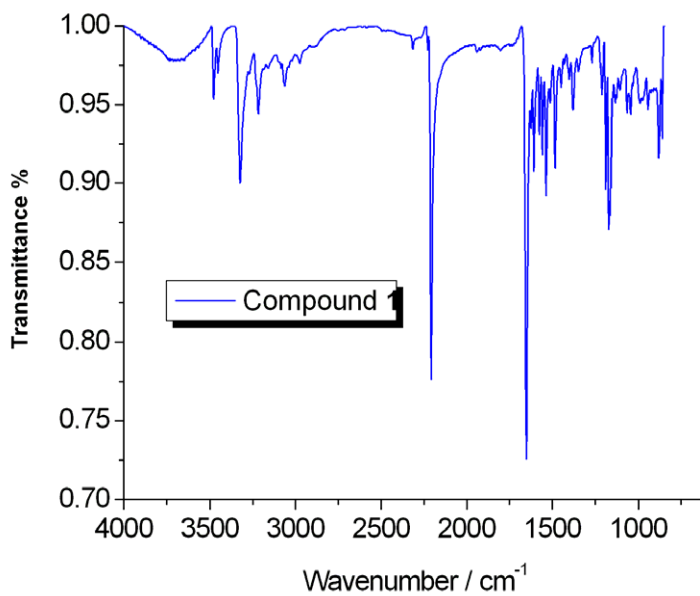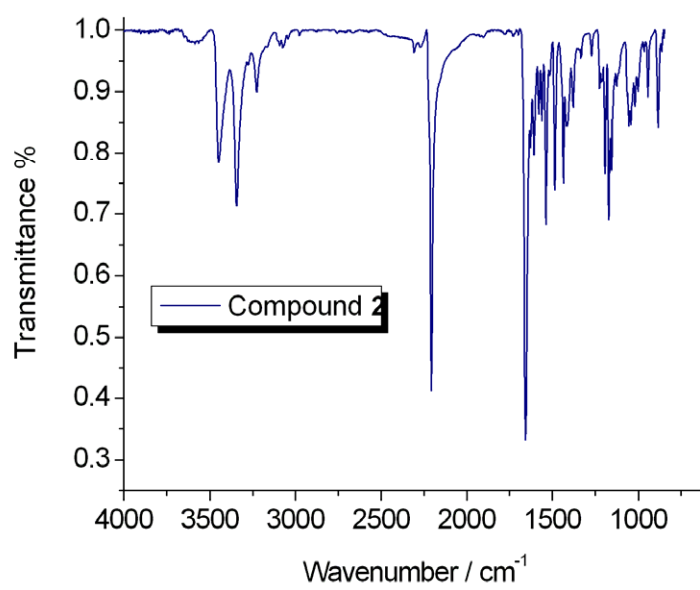

**Fig. S1.** FT-IR spectra of compounds **1** and **2**.

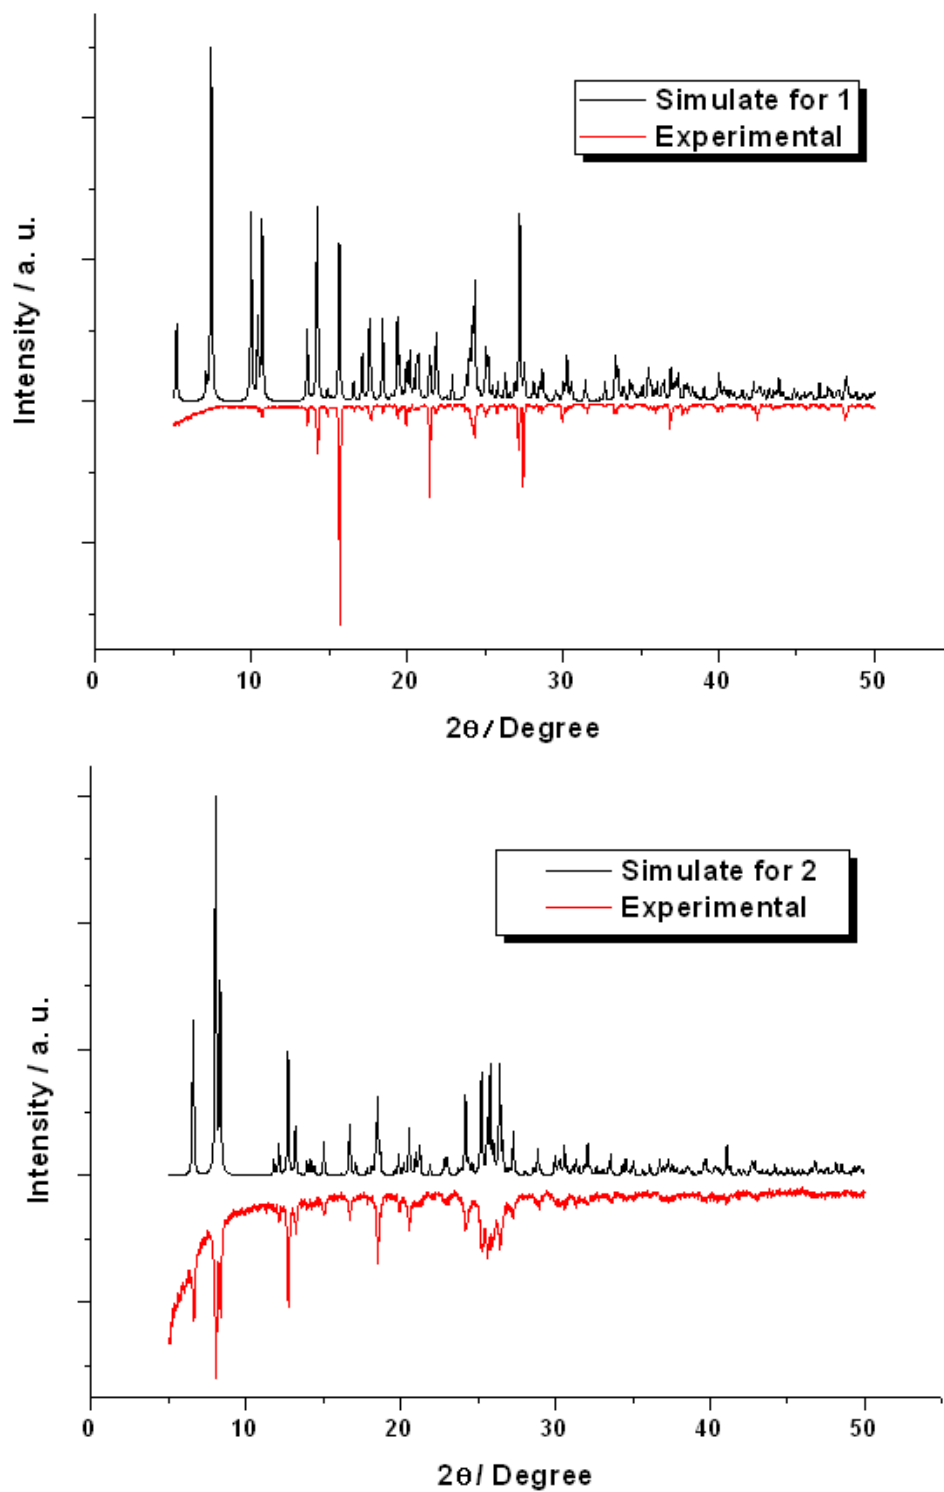

**Fig. S2** Experimental and simulated X-ray powder diffraction patterns of **1** and **2**.

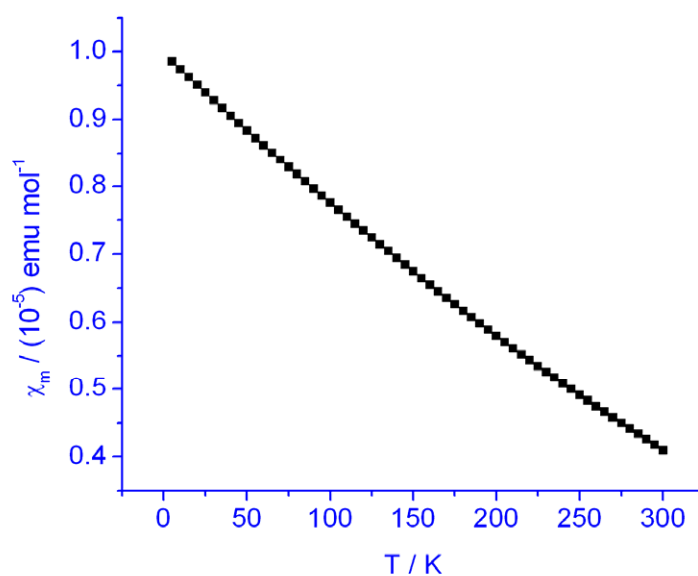

**Fig. S3** The reproduced molar magnetic susceptibility of **2** using the magnetic susceptibility expression of the  $S = \frac{1}{2}$  Heisenberg alternating chain with the alternating constant  $\alpha = 0.08$  and  $J/k_B = 4103$  K from DFT calculation. The paramagnetic susceptibility contributed from the spin chain is less 3% of that the experimental molar magnetic susceptibility in the temperature range of 50-300 K.

**Table S1** The calculated  $\langle S^2 \rangle_{\text{HS}}$ ,  $\langle S^2 \rangle_{\text{BS}}$  and  $J$  values for each spin dimer in the crystals of **1** and **2** at ubp86/lanl2dz, ub3lyp/lanl2dz and usvwn/lanl2dz levels

| Complex        | Spin dimer | $J^{(1)}/k_B$ (K) | $J^{(2)}/k_B$ (K) | $J^{(3)}/k_B$ (K) | $\langle S^2 \rangle_{\text{HS}}$ | $\langle S^2 \rangle_{\text{BS}}$ |
|----------------|------------|-------------------|-------------------|-------------------|-----------------------------------|-----------------------------------|
| ubp86/lanl2dz  |            |                   |                   |                   |                                   |                                   |
| <b>1</b>       | $J_1$      | -45               | -22               | -44               | 2.0035                            | 0.9743                            |
| <b>2</b>       | $J_1^{**}$ | -7404             | -3702             | -3696             | 2.0033                            | 0.0000                            |
|                | $J_2^{**}$ | -62               | -31               | -31               | 2.0032                            | 0.0000                            |
| ub3lyp/lanl2dz |            |                   |                   |                   |                                   |                                   |
| <b>1</b>       | $J_1$      | -12               | -6                | -12               | 2.0140                            | 1.0101                            |
| <b>2</b>       | $J_1^{**}$ | -5414             | -2707             | -2688             | 2.0144                            | 0.0000                            |
|                | $J_2^{**}$ | 2659              | 1329              | 1321              | 2.0135                            | 0.0000                            |
| usvwn/lanl2dz  |            |                   |                   |                   |                                   |                                   |
| <b>1</b>       | $J_1$      | 692               | 346               | 346               | 2.00022                           | 0.0000                            |
| <b>2</b>       | $J_1^{**}$ | -8179             | -4090             | -4085             | 2.0021                            | 0.0000                            |
|                | $J_2^{**}$ | -501              | -250              | -250              | 2.0020                            | 0.0000                            |

\*\* $J_1$  and  $J_2$  correspond to the  $[\text{Pd}(\text{mnt})_2]_2^{2-}$  dimers with  $d_{\text{Pd}\dots\text{Pd}} = 3.408$  and  $4.385$  Å, respectively
